# Supplementary material
Source: PubMed Central journal article supplement (PMC4304999)
Supplement: NIHMS632222-supplement-2.pdf [file NIHMS632222-supplement-2.pdf]

## Supplementary Information

**Supplementary Information Table 1 | *Kras* mutation status of carcinogen-induced mouse lung adenomas**

| Tumour  | Treatment | Strain | Grade   | Genotype | <i>Kras</i> status (WES)* | <i>Kras</i> status (Sanger) <sup>†</sup> |
|---------|-----------|--------|---------|----------|---------------------------|------------------------------------------|
| 32T1    | Urethane  | FVB    | Adenoma | Kras+/-  | Q61L                      | Q61L                                     |
| 32T2    | Urethane  | FVB    | Adenoma | Kras+/-  | Q61R                      | Q61R                                     |
| 32T3    | Urethane  | FVB    | Adenoma | Kras+/-  | Q61L                      | Q61L                                     |
| 33T1    | Urethane  | FVB    | Adenoma | Kras+/-  | Q61L                      | Q61L                                     |
| 33T2    | Urethane  | FVB    | Adenoma | Kras+/-  | Q61L                      | Q61L                                     |
| 33T3    | Urethane  | FVB    | Adenoma | Kras+/-  | Q61L                      | Q61L                                     |
| 33T4    | Urethane  | FVB    | Adenoma | Kras+/-  | Q61L                      | Q61L                                     |
| 33T5    | Urethane  | FVB    | Adenoma | Kras+/-  | Q61L                      | Q61L                                     |
| 47T2    | Urethane  | FVB    | Adenoma | Kras+/-  | Q61L                      | Q61L                                     |
| 48T2    | Urethane  | FVB    | Adenoma | Kras+/-  | Q61L                      | Q61L                                     |
| 48T3    | Urethane  | FVB    | Adenoma | Kras+/-  | Q61L                      | Q61L                                     |
| 48T5    | Urethane  | FVB    | Adenoma | Kras+/-  | Q61L                      | Q61L                                     |
| 1793T1  | Urethane  | FVB    | Adenoma | Kras+/-  | Q61L                      | Q61L                                     |
| 1793T2  | Urethane  | FVB    | Adenoma | Kras+/-  | Q61L                      | Q61L                                     |
| 1793T3  | Urethane  | FVB    | Adenoma | Kras+/-  | Q61L                      | Q61L                                     |
| 1800T1  | Urethane  | FVB    | Adenoma | Kras+/-  | Q61L                      | Q61L                                     |
| 1800T2  | Urethane  | FVB    | Adenoma | Kras+/-  | Q61L                      | Q61L                                     |
| 1800T3  | Urethane  | FVB    | Adenoma | Kras+/-  | Q61L                      | Q61L                                     |
| 309T1   | Urethane  | FVB    | Adenoma | Kras+/-  | Q61L                      | Q61L                                     |
| 309T3   | Urethane  | FVB    | Adenoma | Kras+/-  | Q61L                      | Q61L                                     |
| 66T1    | Urethane  | FVB    | Adenoma | Kras+/-  | Q61L                      | Q61L                                     |
| 66T2    | Urethane  | FVB    | Adenoma | Kras+/-  | Q61L                      | Q61L                                     |
| 66T3    | Urethane  | FVB    | Adenoma | Kras+/-  | Q61H                      | Q61H                                     |
| 75T1    | Urethane  | FVB    | Adenoma | Kras+/-  | Q61L                      | Q61L                                     |
| 75T2    | Urethane  | FVB    | Adenoma | Kras+/-  | Q61L                      | Q61L                                     |
| 75T3    | Urethane  | FVB    | Adenoma | Kras+/-  | Q61L                      | Q61L                                     |
| 45T3    | Urethane  | FVB    | Adenoma | WT       | Q61R                      | NA                                       |
| 45T4    | Urethane  | FVB    | Adenoma | WT       | Q61R                      | No mut                                   |
| 45T5    | Urethane  | FVB    | Adenoma | WT       | Q61R                      | Q61R                                     |
| 45T6    | Urethane  | FVB    | Adenoma | WT       | Q61R                      | Q61R                                     |
| 44T2    | Urethane  | FVB    | Adenoma | WT       | Q61R                      | Q61R                                     |
| 44T3    | Urethane  | FVB    | Adenoma | WT       | Q61R                      | Q61R                                     |
| 35T1    | Urethane  | FVB    | Adenoma | WT       | Q61R                      | Q61R                                     |
| 35T2    | Urethane  | FVB    | Adenoma | WT       | Q61R                      | Q61R                                     |
| 35T3    | Urethane  | FVB    | Adenoma | WT       | Q61R                      | Q61R                                     |
| 63T1    | Urethane  | FVB    | Adenoma | WT       | Q61R                      | NA                                       |
| 1T1     | Urethane  | FVB    | Adenoma | WT       | Q61L                      | Q61L                                     |
| 1T2     | Urethane  | FVB    | Adenoma | WT       | Q61R                      | NA                                       |
| 1T3     | Urethane  | FVB    | Adenoma | WT       | Q61R                      | No mut                                   |
| 2T1     | Urethane  | FVB    | Adenoma | WT       | Q61R                      | Q61R                                     |
| 2T2     | Urethane  | FVB    | Adenoma | WT       | Q61R                      | Q61R                                     |
| 2T3     | Urethane  | FVB    | Adenoma | WT       | Q61R                      | Q61R                                     |
| 1790T1  | Urethane  | FVB    | Adenoma | WT       | Q61R                      | Q61R                                     |
| 1790T3  | Urethane  | FVB    | Adenoma | WT       | Q61R                      | Q61R                                     |
| 1039T2  | MNU       | FVB    | Adenoma | Kras+/-  | G12D                      | NA                                       |
| 1039T3  | MNU       | FVB    | Adenoma | Kras+/-  | G12D                      | G12D                                     |
| 1039T4  | MNU       | FVB    | Adenoma | Kras+/-  | G12D                      | G12D                                     |
| 1039T5  | MNU       | FVB    | Adenoma | Kras+/-  | G12D                      | NA                                       |
| 1024T1  | MNU       | FVB    | Adenoma | Kras+/-  | G12D                      | G12D                                     |
| 1024T2  | MNU       | FVB    | Adenoma | Kras+/-  | G12D                      | G12D                                     |
| 1024T3  | MNU       | FVB    | Adenoma | Kras+/-  | G12D                      | G12D                                     |
| 1024T4  | MNU       | FVB    | Adenoma | Kras+/-  | G12D                      | G12D                                     |
| 1024T5  | MNU       | FVB    | Adenoma | Kras+/-  | G12D                      | NA                                       |
| 1024T6  | MNU       | FVB    | Adenoma | Kras+/-  | G12D                      | NA                                       |
| 1024T7  | MNU       | FVB    | Adenoma | Kras+/-  | G12D                      | G12D                                     |
| 1024T8  | MNU       | FVB    | Adenoma | Kras+/-  | G12D                      | G12D                                     |
| 1024T9  | MNU       | FVB    | Adenoma | Kras+/-  | G12D                      | G12D                                     |
| 1024T10 | MNU       | FVB    | Adenoma | Kras+/-  | G12D                      | G12D                                     |
| 1024T11 | MNU       | FVB    | Adenoma | Kras+/-  | G12D                      | G12D                                     |
| 1045T1  | MNU       | FVB    | Adenoma | Kras+/-  | G12D                      | No mut                                   |
| 1045T2  | MNU       | FVB    | Adenoma | Kras+/-  | G12D                      | G12D                                     |
| 1045T3  | MNU       | FVB    | Adenoma | Kras+/-  | G12D                      | NA                                       |
| 1045T4  | MNU       | FVB    | Adenoma | Kras+/-  | G12D                      | G12D                                     |
| 1045T5  | MNU       | FVB    | Adenoma | Kras+/-  | G12D                      | G12D                                     |
| 1045T7  | MNU       | FVB    | Adenoma | Kras+/-  | G12D                      | G12D                                     |
| 1012T3  | MNU       | FVB    | Adenoma | WT       | No mut                    | NA                                       |
| 1026T1  | MNU       | FVB    | Adenoma | WT       | G12D                      | G12D                                     |
| 1026T2  | MNU       | FVB    | Adenoma | WT       | G12D                      | NA                                       |
| 1011T1  | MNU       | FVB    | Adenoma | WT       | G12D                      | NA                                       |
| 1029T1  | MNU       | FVB    | Adenoma | WT       | G12D                      | NA                                       |

<sup>†</sup> NA = data not available due to assay failure

\* *Kras* status (WES): *Kras* mutation determined by whole-exome sequencing

**Supplementary Information Table 2 | Mouse lung adenoma cancer driver gene SNVs compared against COSMIC database of human cancers**

This table is provided as a separate excel attachment (SI\_Table2.xlsx) in Supplementary Information.

**Supplementary Information Table 3 | *MTUS1* expression and overall survival in lung cancer patients**

| <b>Study</b>                | <b>Platform</b>                   | <b>Class</b> | <b>Stages</b> | <b>Patients (n)</b> | <b>Covariates</b>           | <b><math>\chi^2</math></b> | <b>p-value</b> |
|-----------------------------|-----------------------------------|--------------|---------------|---------------------|-----------------------------|----------------------------|----------------|
| TCGA_LUAD<br>exp_HiSeqV2    | Illumina HiSeq<br>2000 RNA Seq    | ADCA         | I-IV          | 354                 | Sex, Age, Pack Years, Stage | 10.9                       | 0.00097        |
| Shedden K, et<br>al. (2008) | Affymetrix<br>U133A<br>Expression | ADCA         | I-III         | 440                 | Sex, Age, Stage             | 4.4                        | 0.036          |
| TCGA_LUSC<br>exp_HiSeqV2    | Illumina HiSeq<br>2000 RNA Seq    | SCC          | I-IV          | 308                 | Sex, Age, Pack Years, Stage | 0.1                        | 0.76           |
| Raponi M, et al.<br>(2006)  | Affymetrix<br>U133A<br>Expression | SCC          | I-III         | 130                 | Sex, Age, Pack Years, Stage | 1.83                       | 0.18           |

**Supplementary Information Table 4 | *Kras* mutation status of urethane-induced mouse lung adenocarcinomas**

| Tumour    | Treatment | Strain | Grade*         | Genotype        | <i>Kras</i> status (WES) <sup>†</sup> | <i>Kras</i> status (Sanger) |
|-----------|-----------|--------|----------------|-----------------|---------------------------------------|-----------------------------|
| 006B2 AC1 | Urethane  | A/J    | Adenocarcinoma | WT              | NA                                    | Q61R                        |
| 006B3 AC  | Urethane  | A/J    | Adenocarcinoma | WT              | G12V                                  | G12V                        |
| 006C8 AC1 | Urethane  | A/J    | Adenocarcinoma | WT              | NA                                    | Q61L                        |
| 006C8 AC2 | Urethane  | A/J    | Adenocarcinoma | WT              | Q61R                                  | Q61R                        |
| 004E3 AC1 | Urethane  | A/J    | Adenocarcinoma | WT              | Q61R                                  | Q61R                        |
| 004E3 AC2 | Urethane  | A/J    | Adenocarcinoma | WT              | Q61L                                  | Q61L                        |
| 004E4 AC1 | Urethane  | A/J    | Adenocarcinoma | WT              | Q61R                                  | Q61R                        |
| 004E4 AC2 | Urethane  | A/J    | Adenocarcinoma | WT              | Q61R                                  | Q61R                        |
| 004E4 AC3 | Urethane  | A/J    | Adenocarcinoma | WT              | NA                                    | Q61R                        |
| 011A5 AC  | Urethane  | A/J    | Adenocarcinoma | WT              | NA                                    | Q61R                        |
| 010E7 AC1 | Urethane  | A/J    | NA             | WT              | Q61R                                  | Q61R                        |
| 010E7 AC4 | Urethane  | A/J    | NA             | WT              | Q61R                                  | Q61R                        |
| 010E7 AC6 | Urethane  | A/J    | NA             | WT              | NA                                    | Q61R                        |
| 51 AC1    | Urethane  | FVB    | Adenocarcinoma | <i>Kras</i> +/- | Q61L                                  | Q61L                        |
| 66 AC1    | Urethane  | FVB    | Adenocarcinoma | WT              | Q61R                                  | Q61R                        |
| 2913 AC1  | Urethane  | FVB    | Adenocarcinoma | <i>Kras</i> +/- | Q61L                                  | Q61L                        |
| 2913 AC2  | Urethane  | FVB    | Adenocarcinoma | <i>Kras</i> +/- | Q61L                                  | Q61L                        |
| 2915 AC1  | Urethane  | FVB    | Adenocarcinoma | <i>Kras</i> +/- | Q61L                                  | Q61L                        |
| 2915 AC2  | Urethane  | FVB    | Adenocarcinoma | <i>Kras</i> +/- | Q61L                                  | Q61L                        |
| 2916 AC1  | Urethane  | FVB    | Adenocarcinoma | <i>Kras</i> +/- | Q61H                                  | Q61H                        |
| 2916 AC2  | Urethane  | FVB    | Adenocarcinoma | <i>Kras</i> +/- | Q61L                                  | Q61L                        |
| 2916 AC3  | Urethane  | FVB    | Adenocarcinoma | <i>Kras</i> +/- | Q61L                                  | Q61L                        |

\* NA = data not available due to insufficient tissue for histology

<sup>†</sup> *Kras* status (WES): *Kras* mutation determined by whole-exome sequencing. NA = data not available due to poor coverage at *Kras* in some samples

**Supplementary Information Table 5 | Mouse adenocarcinoma SNVs in established cancer driver genes and *Fat4***

| Chr | Position  | Gene   | Exon | Substitution | Consequence | Observed | Tumours   | Validated | Validation Method |
|-----|-----------|--------|------|--------------|-------------|----------|-----------|-----------|-------------------|
| 2   | 122151067 | B2m    | 2    | CAC>G        | T88A        | 1        | 004E3 AC1 | Yes       | Sanger            |
| 3   | 84904008  | Fbxw7  | 3    | CAC>T        | T147S       | 1        | 006B3 AC  | Yes       | Sanger            |
| 6   | 47545835  | Ezh2   | 10   | AGG>A        | G356R       | 1        | 2916 AC3  | Yes       | Sanger            |
| 6   | 113624325 | Vhl    | 1    | CAG>C        | Q62P        | 1        | 006B3 AC  | Yes       | Sanger            |
| 9   | 110594639 | Setd2  | 15   | AGT>A        | S2254N      | 1        | 2915 AC1  | Yes       | Sanger            |
| 10  | 81531160  | Gna11  | 6    | AAC>G        | N274S       | 1        | 010E7 AC1 | Yes       | Sanger            |
| 11  | 4782278   | Nf2    | 15   | AAA>G        | K550R       | 1        | 004E3 AC2 | Yes       | Sanger            |
| 12  | 3896970   | Dnmt3a | 5    | GAA>G        | N180D       | 1        | 66 AC1    | Yes       | Sanger            |
| 13  | 111750558 | Map3k1 | 19   | CAG>T        | Q1406L      | 1        | 2913 AC1  | Yes       | Sanger            |
| 15  | 98857427  | Mll2   | 19   | CGC>A        | A1524T      | 1        | 006C8 AC1 | Yes       | Sanger            |
| 19  | 6335662   | Men1   | 2    | CGC>A        | A74T        | 1        | 2913 AC1  | Yes       | Sanger            |
| 3   | 38887878  | Fat4   | 1    | CGT>A        | V307M       | 1        | 66 AC1    | Yes       | Sanger            |
| 3   | 38951175  | Fat4   | 4    | AAC>G        | T1908A      | 1        | 2916 AC2  | Yes       | Sanger            |
| 3   | 38981249  | Fat4   | 9    | AAT>C        | L3017V      | 1        | 006B3 AC  | Yes       | Sanger            |

**Supplementary Information Table 6 | Comparison of mutations involving driver genes in all carcinogen-induced mouse lung tumours and human lung adenocarcinoma**

| Gene    | LUAD obs | LUAD % | KRAS LUAD obs | KRAS LUAD % | Mouse obs | Mouse % |
|---------|----------|--------|---------------|-------------|-----------|---------|
| AKT1    | 2        | 0.9    | 1             | 1.5         | 1         | 1.1     |
| ALK     | 19       | 8.3    | 5             | 7.4         | 1         | 1.1     |
| APC     | 9        | 3.9    | 2             | 2.9         | 1         | 1.1     |
| ARID1A  | 17       | 7.4    | 5             | 7.4         | 2         | 2.2     |
| ARID1B  | 10       | 4.3    | 5             | 7.4         | 3         | 3.3     |
| ASXL1   | 4        | 1.7    | 0             | 0           | 2         | 2.2     |
| ATM     | 25       | 10.9   | 13            | 19.1        | 3         | 3.3     |
| ATRX    | 15       | 6.5    | 3             | 4.4         | 1         | 1.1     |
| AXIN1   | 2        | 0.9    | 1             | 1.5         | 1         | 1.1     |
| B2M     | 1        | 0.4    | 0             | 0           | 1         | 1.1     |
| BRCA1   | 7        | 3      | 2             | 2.9         | 1         | 1.1     |
| BRCA2   | 11       | 4.8    | 4             | 5.9         | 1         | 1.1     |
| CARD11  | 14       | 6.1    | 4             | 5.9         | 1         | 1.1     |
| CBL     | 4        | 1.7    | 1             | 1.5         | 1         | 1.1     |
| CIC     | 3        | 1.3    | 1             | 1.5         | 2         | 2.2     |
| CREBBP  | 10       | 4.3    | 4             | 5.9         | 3         | 3.3     |
| DAXX    | 2        | 0.9    | 1             | 1.5         | 1         | 1.1     |
| DNMT3A  | 6        | 2.6    | 3             | 4.4         | 2         | 2.2     |
| EP300   | 2        | 0.9    | 1             | 1.5         | 1         | 1.1     |
| EZH2    | 4        | 1.7    | 1             | 1.5         | 1         | 1.1     |
| FAM123B | 14       | 6.1    | 6             | 8.8         | 1         | 1.1     |
| FBXW7   | 4        | 1.7    | 3             | 4.4         | 1         | 1.1     |
| FGFR2   | 5        | 2.2    | 1             | 1.5         | 1         | 1.1     |
| FGFR3   | 1        | 0.4    | 1             | 1.5         | 2         | 2.2     |
| FGFR4   | 3        | 1.3    | 0             | 0           | 1         | 1.1     |
| FLT3    | 11       | 4.8    | 1             | 1.5         | 1         | 1.1     |
| GATA2   | 1        | 0.4    | 1             | 1.5         | 1         | 1.1     |
| GATA3   | 6        | 2.6    | 1             | 1.5         | 1         | 1.1     |
| GNA11   | 0        | 0      | 0             | 0           | 1         | 1.1     |
| HNF1A   | 0        | 0      | 0             | 0           | 1         | 1.1     |
| IDH1    | 3        | 1.3    | 2             | 2.9         | 1         | 1.1     |
| JAK2    | 9        | 3.9    | 6             | 8.8         | 1         | 1.1     |
| KDM5C   | 5        | 2.2    | 2             | 2.9         | 2         | 2.2     |
| KIT     | 5        | 2.2    | 3             | 4.4         | 1         | 1.1     |
| KLF4    | 3        | 1.3    | 0             | 0           | 1         | 1.1     |
| MAP3K1  | 4        | 1.7    | 2             | 2.9         | 2         | 2.2     |
| MAP3K9  | 6        | 2.6    | 2             | 2.9         | 3         | 3.3     |
| MED12   | 16       | 7      | 6             | 8.8         | 1         | 1.1     |
| MEN1    | 1        | 0.4    | 1             | 1.5         | 2         | 2.2     |
| MET     | 17       | 7.4    | 3             | 4.4         | 1         | 1.1     |
| MLL2    | 19       | 8.3    | 8             | 11.8        | 3         | 3.3     |
| MTUS1   | 4        | 1.7    | 0             | 0           | 4         | 4.3     |
| NCOR1   | 11       | 4.8    | 3             | 4.4         | 1         | 1.1     |
| NF1     | 30       | 13     | 1             | 1.5         | 1         | 1.1     |
| NF2     | 1        | 0.4    | 0             | 0           | 1         | 1.1     |
| NOTCH2  | 7        | 3      | 2             | 2.9         | 1         | 1.1     |
| PAX5    | 1        | 0.4    | 0             | 0           | 1         | 1.1     |
| PDGFRA  | 15       | 6.5    | 6             | 8.8         | 2         | 2.2     |
| PPP2R1A | 4        | 1.7    | 0             | 0           | 2         | 2.2     |
| PTCH1   | 11       | 4.8    | 4             | 5.9         | 1         | 1.1     |
| RB1     | 10       | 4.3    | 2             | 2.9         | 6         | 6.5     |
| RET     | 9        | 3.9    | 3             | 4.4         | 1         | 1.1     |
| RNF43   | 3        | 1.3    | 0             | 0           | 1         | 1.1     |
| SETD2   | 20       | 8.7    | 4             | 5.9         | 1         | 1.1     |
| SF3B1   | 5        | 2.2    | 0             | 0           | 1         | 1.1     |
| TNFAIP3 | 2        | 0.9    | 1             | 1.5         | 1         | 1.1     |
| VHL     | 0        | 0      | 0             | 0           | 1         | 1.1     |

**Tumours = 230**

Number and % of consequential mutations in TCGA LUAD WES

**Tumours = 68**

Number and % of consequential mutations in TCGA LUAD KRAS-mutant tumours

**Tumours = 92**

Number and % of consequential mutations in carcinogen-induced mouse tumours in this study

**Supplementary Information Table 7 | Mouse and human SNVs of cancer driver genes occurring in close proximity**

| Gene    | Mouse mut    | Mouse obs | Human hom aa pos | LUAD mut        | LUAD obs | Mouse SNV Consequence                      |
|---------|--------------|-----------|------------------|-----------------|----------|--------------------------------------------|
| AKT1    | E40K         | 1         | 40               | E17K            | 1        | Constitutive activation                    |
| ALK     | G133R        | 1         | 129              | V132L           | 1        |                                            |
| ARID1A  | S520F        | 1         | 519              | Q479*           | 1        |                                            |
| ARID1B  | P564L        | 1         | 554              | G530C           | 1        |                                            |
| ASXL1   | P430S        | 1         | 430              | G434V           | 1        |                                            |
| ATM     | S367F        | 1         | 367              | Q355_splice     | 1        | Autophosphorylation site: loss of function |
| ATM     | E648K        | 1         | 649              | Q628*           | 1        |                                            |
| B2M     | T88A         | 1         | 88               | E70*            | 1        |                                            |
| CBL     | S401F        | 1         | 403              | C401F, D429_del | 2        | RING finger domain hotspot                 |
| CIC     | I1432F       | 1         | 1436             | E1405*          | 1        |                                            |
| CREBBP  | P1353S       | 1         | 1352             | K1367N          | 1        |                                            |
| DAXX    | D596N        | 1         | 595              | L566F           | 1        |                                            |
| EZH2    | G356R        | 1         | 361              | E341K           | 1        |                                            |
| FBXW7   | T147S        | 1         | 144              | E113*           | 1        |                                            |
| GATA2   | Y376C        | 1         | 376              | S340_splice     | 1        |                                            |
| MEN1    | G169R        | 1         | 163              | A165D           | 1        |                                            |
| MET     | K1196Q       | 1         | 1216             | Y1235H          | 1        |                                            |
| NF2     | K550R        | 1         | 550              | E527Q           | 1        |                                            |
| NOTCH2  | P426S        | 1         | 426              | S462*           | 1        |                                            |
| PDGFRA  | N711I        | 1         | 711              | E726Q           | 1        |                                            |
| PDGFRA  | D877N        | 1         | 877              | A916T           | 1        |                                            |
| PPP2R1A | P523L        | 1         | 523              | A541G           | 1        |                                            |
| RB1     | S744F, S766F | 2         | 751, 773         | Y756C           | 1        |                                            |

Table of carcinogen-induced mouse SNVs and human TCGA LUAD SNVs in cancer driver genes occurring within + or - 40 aa of homologous position

**Supplementary Information Table 8 | Adenocarcinoma CGN>A (NCG>T) signature validation**

| Chr | Position  | Gene          | Exon* | Substitution | Consequence | Obs | Tumours   | Validated <sup>†</sup> | Validation Method <sup>‡</sup> |
|-----|-----------|---------------|-------|--------------|-------------|-----|-----------|------------------------|--------------------------------|
| 15  | 98857427  | Mll2          | 19    | CGC>A        | A1524T      | 1   | 006C8 AC1 | Yes                    | Sanger                         |
| 19  | 6335662   | Men1          | 2     | CGC>A        | A74T        | 1   | 2913 AC1  | Yes                    | Sanger                         |
| 3   | 38887878  | Fat4          | 1     | CGT>A        | V307M       | 1   | 66 AC1    | Yes                    | Sanger                         |
| 19  | 6255487   | Atg2a         | 27    | CGC>A        | A1266T      | 1   | 006C8 AC1 | Yes                    | Sanger                         |
| 1   | 53851676  | Hecw2         | 21    | CGG>A        | R1227X      | 1   | 006C8 AC1 | Yes                    | Sanger                         |
| 1   | 135402359 | Ipo9          | 13    | CGA>A        | E448K       | 1   | 2913 AC1  | Yes                    | Sanger                         |
| 4   | 3748753   | Lyn           | 8     | CGG>A        | R244W       | 1   | 004E3 AC2 | Yes                    | Sanger                         |
| 8   | 41000849  | Mtus1         | 9     | CGG>A        | A982A       | 1   | 2916 AC2  | Yes                    | Sanger                         |
| 15  | 76189287  | Plec          | 13    | CGG>A        | R306Q       | 1   | 004E3 AC2 | Yes                    | Sanger                         |
| 17  | 86493271  | Prkce         | 9     | CGG>A        | R372X       | 1   | 2915 AC1  | Yes                    | Sanger                         |
| 14  | 51130312  | Rnase6        | 2     | CGC>A        | R54C        | 1   | 66 AC1    | Yes                    | Sanger                         |
| 16  | 35663231  | Sema5b        | 22    | CGG>A        | R1080W      | 1   | 004E4 AC3 | Yes                    | Sanger                         |
| 17  | 80406840  | Sos1          | 20    | CGG>A        | R1067Q      | 1   | 2913 AC2  | Yes                    | Sanger                         |
| 2   | 21746709  | Gpr158        | 6     | CGA>A        | R480C       | 1   | 006C8 AC2 | Yes                    | Sanger                         |
| 10  | 38966081  | Lama4         | 1     | CGG>A        | G43S        | 1   | 2916 AC1  | Yes                    | Both                           |
| 12  | 54068154  | Npas3         | 12    | CGG>A        | R620X       | 1   | 004E4 AC1 | Yes                    | Visual inspection              |
| 8   | 83424085  | Clgn          | 12    | CGG>A        | R460X       | 1   | 006B2 AC1 | Inconclusive           | Both                           |
| 10  | 94514984  | Tmcc3         | NA    | CGC>A        | NA          | 1   | 2913 AC2  | Inconclusive           | Both                           |
| 11  | 3132472   | Sfi1          | NA    | CGT>A        | NA          | 1   | 2913 AC1  | Inconclusive           | Both                           |
| 12  | 57542962  | Foxa1         | 2     | CGC>A        | G157G       | 1   | 51 AC1    | Inconclusive           | Both                           |
| 15  | 80692611  | A430088P11Rik | NA    | CGC>A        | NA          | 1   | 2915 AC1  | Inconclusive           | Both                           |
| 19  | 53618124  | Smc3          | 5     | CGA>A        | S85L        | 1   | 2913 AC1  | Inconclusive           | Both                           |
| X   | 73778326  | Srpk3         | 14    | CGG>A        | R498Q       | 1   | 2916 AC3  | Inconclusive           | Both                           |

\* NA = non-exonic location.

<sup>†</sup> Variants were called inconclusive if visual inspection supported somatic origin, but variant read depth was <10.

<sup>‡</sup> Validation Method: Both = Sanger sequencing and visual inspection.
